# Supplementary material for: Ecotoxicity risk assessment of amines used in ‘switchable water’ and CO 2 -capturing processes
Source: Royal Society of Chemistry journal article supplement (doi:10.1039/d4em00657g), 2025-01-01
Supplement: d4em00657g1.pdf [file d4em00657g1.pdf]

## Supporting information

# Ecotoxicity risk assessment of amines used in 'switchable water' and CO<sub>2</sub>-capturing processes

Alina Ismagilova,<sup>†</sup> Veljo Kisand,<sup>\*,†</sup> and Lauri Vares<sup>\*,†</sup>

<sup>†</sup> Institute of Technology, University of Tartu, Nooruse 1, Tartu 50411, Estonia

\*E-mail: veljo.kisand@ut.ee, lauri.vares@ut.ee

## Table of Contents

|                                                                                                                               |          |
|-------------------------------------------------------------------------------------------------------------------------------|----------|
| <i>Values of the mean effective concentration (EC<sub>50</sub>, mg L<sup>-1</sup>) of the amines with CI 95% values .....</i> | <b>1</b> |
| <i>Statistical analysis by one-way ANOVA .....</i>                                                                            | <b>2</b> |
| <i>Amine stability after incubation under test conditions .....</i>                                                           | <b>2</b> |
| <i>Linear trends for log(1/EC<sub>50</sub>) versus logK<sub>ow</sub> according to test organisms .....</i>                    | <b>7</b> |

## Values of the mean effective concentration (EC<sub>50</sub>, mg L<sup>-1</sup>) of the amines with CI 95% values

A confidence interval (CI) is the mean of the estimate plus and minus the variation of the estimate. 95% CI gives 95% certainty that the expected values of the experiment will be within this interval. The 95% CI is calculated by a standard formula:

$$\bar{x} \pm 1.96 \frac{s}{\sqrt{n}}$$

Where:  $\bar{x}$  – the mean value

s – standard deviation

n – sample size

The EC<sub>50</sub> values were determined at the 50% level on the X-axis of the dose–response curves.

**Table S1.** Values of the mean effective concentration (EC, mg L<sup>-1</sup>) of amines tested with CI 95% values.

| Compound                                 | Short name | <i>A. fischeri</i>     | <i>S. polyrhiza</i>     | <i>D. magna</i>         |
|------------------------------------------|------------|------------------------|-------------------------|-------------------------|
|                                          |            | EC50, mg/l<br>(CI 95%) | EC50, mg/l<br>(CI 95%)  | EC50, mg/l<br>(CI 95%)  |
| Monoethanolamine                         | MEA        | 227<br>(150; 304)      | 358.5<br>(262.4; 454.6) | 260.3<br>(203.1; 317.5) |
| Diethanolamine                           | DEA        | 468<br>(280; 656)      | 549.5<br>(479.6; 619.4) | 368<br>(288.5; 447.5)   |
| Triethanolamine                          | TEA        | 1033<br>(896; 1169)    | >1000                   | >1000                   |
| Dimethylethanolamine                     | DMEA       | 437<br>(293; 581)      | 228.7<br>(269.5; 379.7) | 223<br>(213; 234)       |
| 2-amino-2methylpropanol                  | AMP        | 475<br>(279; 671)      | 310<br>(240.3; 379.7)   | 327<br>(287; 367)       |
| N,N,N',N'-tetramethylethane-1,2-diamine  | TMEDA      | 167<br>(149; 186)      | 348<br>(308.1; 387.9)   | 247<br>(192; 302)       |
| N,N,N',N'-tetramethyl-1,3-propanediamine | TMPDA      | 145<br>(117; 172)      | 61<br>(40.9; 81.1)      | 73<br>(69; 77)          |

## Statistical analysis by one-way ANOVA

**Table S2.** One-way ANOVA and post hoc pairwise comparison (Tukey test) between EC<sub>50</sub> values of studied amines *p* values are adjusted for multiple testing.

|       | AMP               | DEA               | DMEA              | MEA               | TEA               | TMEDA             | TMPDA |
|-------|-------------------|-------------------|-------------------|-------------------|-------------------|-------------------|-------|
| AMP   | NA                | NA                | NA                | NA                | NA                | NA                | NA    |
| DEA   | <i>p</i> = 0.178  | NA                | NA                | NA                | NA                | NA                | NA    |
| DMEA  | <i>p</i> = 0.398  | <i>p</i> = 0.0006 | NA                | NA                | NA                | NA                | NA    |
| MEA   | <i>p</i> = 0.1989 | <i>p</i> = 0.0001 | <i>p</i> = 0.9996 | NA                | NA                | NA                | NA    |
| TEA   | <i>p</i> < 0.0001 | <i>p</i> < 0.0001 | <i>p</i> < 0.0001 | <i>p</i> < 0.0001 | NA                | NA                | NA    |
| TMEDA | <i>p</i> = 0.0331 | <i>p</i> < 0.0001 | <i>p</i> = 0.9022 | <i>p</i> = 0.987  | <i>p</i> < 0.0001 | NA                | NA    |
| TMPDA | <i>p</i> < 0.0001 | <i>p</i> < 0.0000 | <i>p</i> < 0.0001 | <i>p</i> = 0.0001 | <i>p</i> < 0.0001 | <i>p</i> = 0.0008 | NA    |

## Amine stability after incubation under test conditions

Two amines (TMPDA and TMEDA) with a concentration of 4000 mgL<sup>-1</sup> were incubated for 15 min in 2% NaCl aqueous solution and 72h in standard freshwater, in both cases without organisms. After incubation, the amines were extracted from the water-based media with CHCl<sub>2</sub>. Next, the solvent was removed on the rotary evaporator, and the resulting residue was analyzed by <sup>1</sup>H and <sup>13</sup>C NMR. The obtained spectra were compared with the spectra of pure TMPDA and TMEDA. No changes in NMR spectra were detected except for a small CHCl<sub>2</sub> signal. Thus, it can be concluded that the incubation conditions and media do not cause the decomposition of these substances.

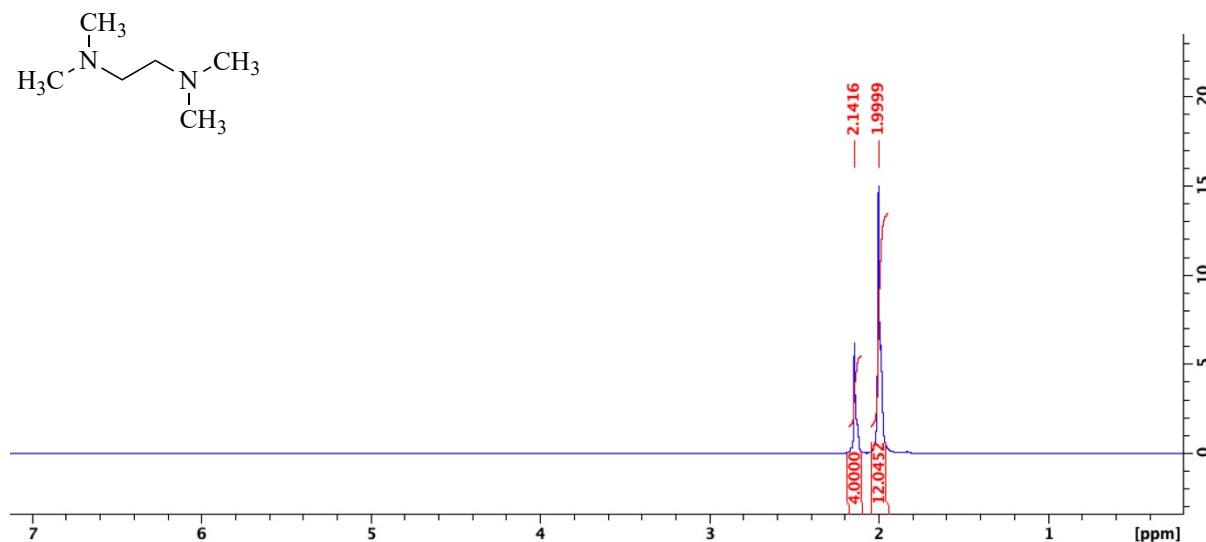

**Fig. S1.** <sup>1</sup>H 400 MHz NMR spectrum of TMEDA without incubation

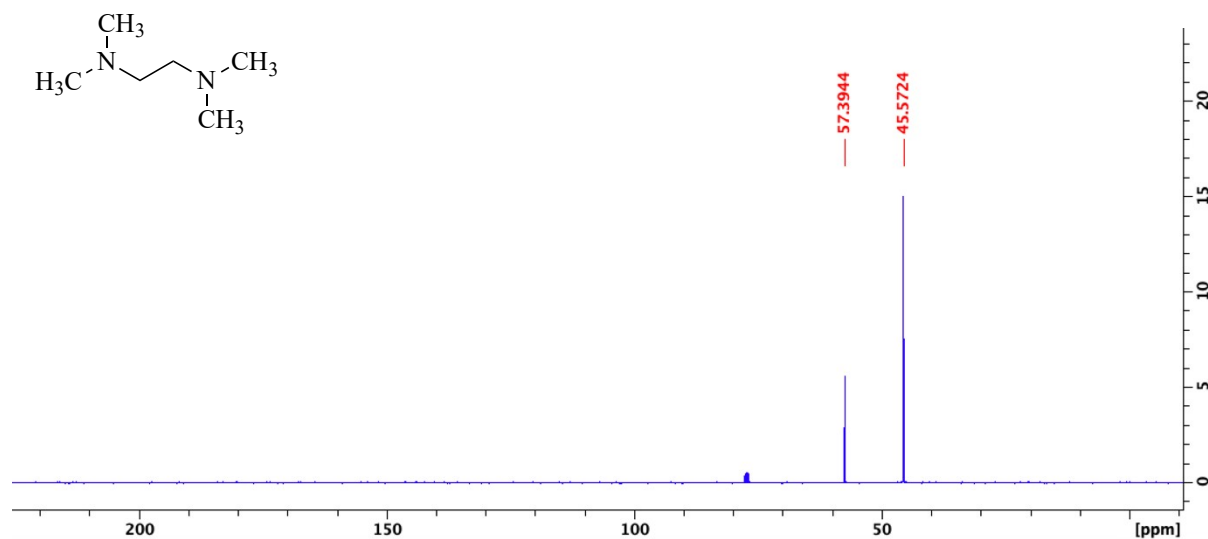

**Fig. S2.**  $^{13}\text{C}$  400 MHz NMR spectrum of TMEDA without incubation

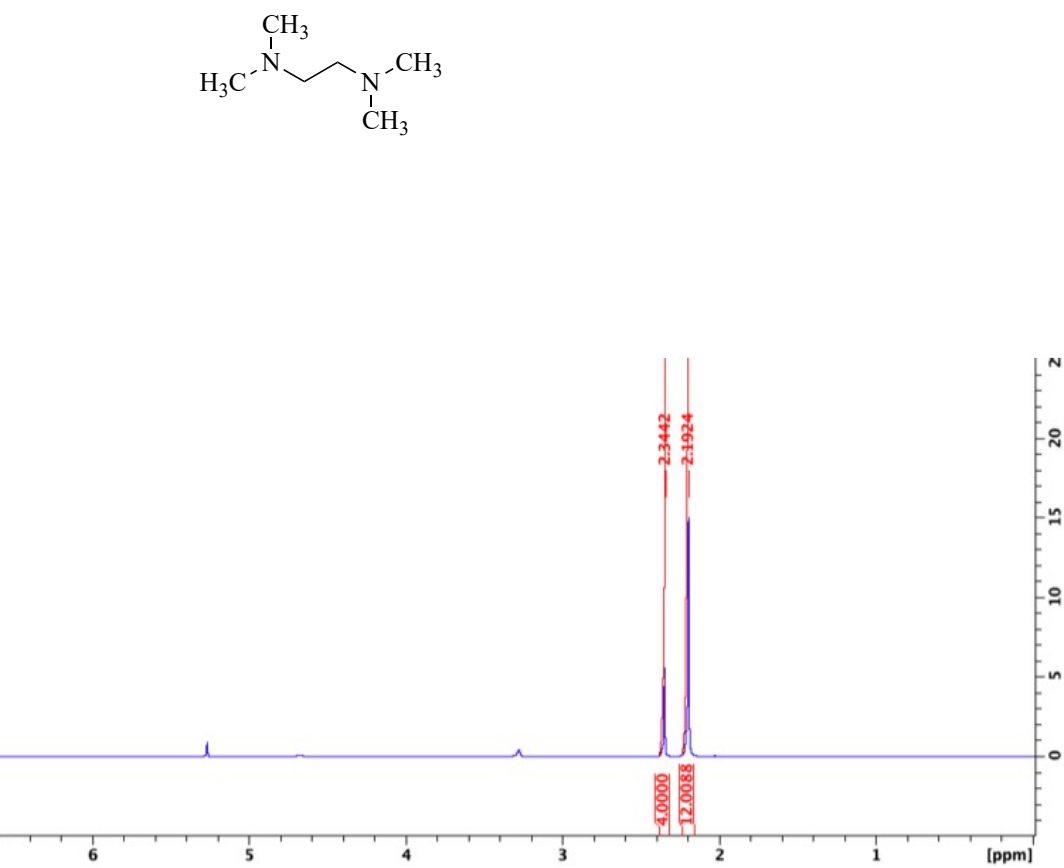

**Fig. S3.**  $^1\text{H}$  400 MHz NMR spectrum of TMEDA after 15-minute incubation in NaCl

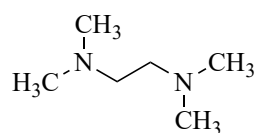

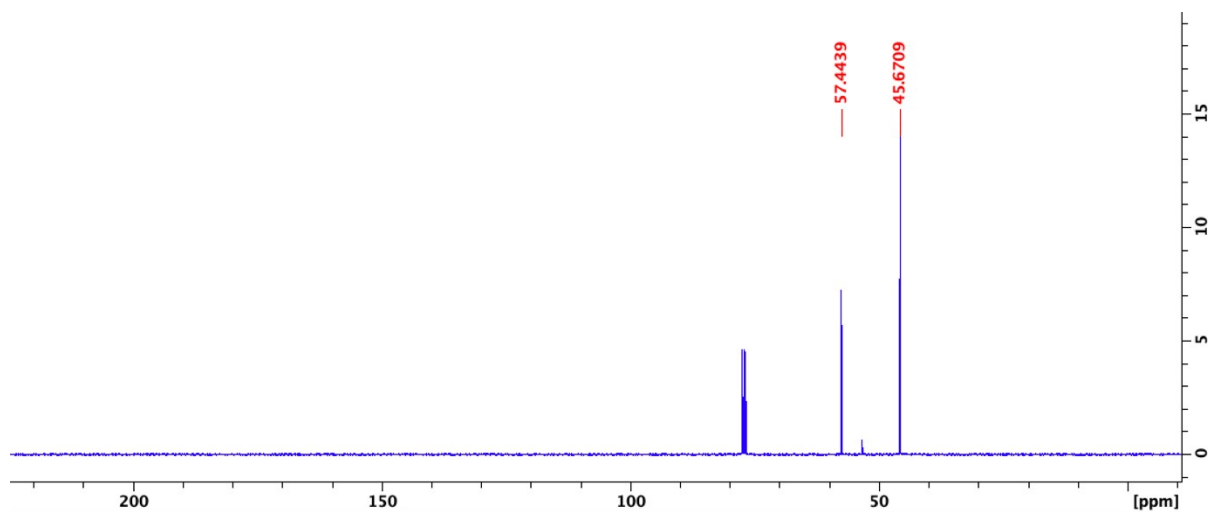

**Fig. S4.** <sup>13</sup>C 400 MHz NMR spectrum of TMEDA after 15-minute incubation in NaCl

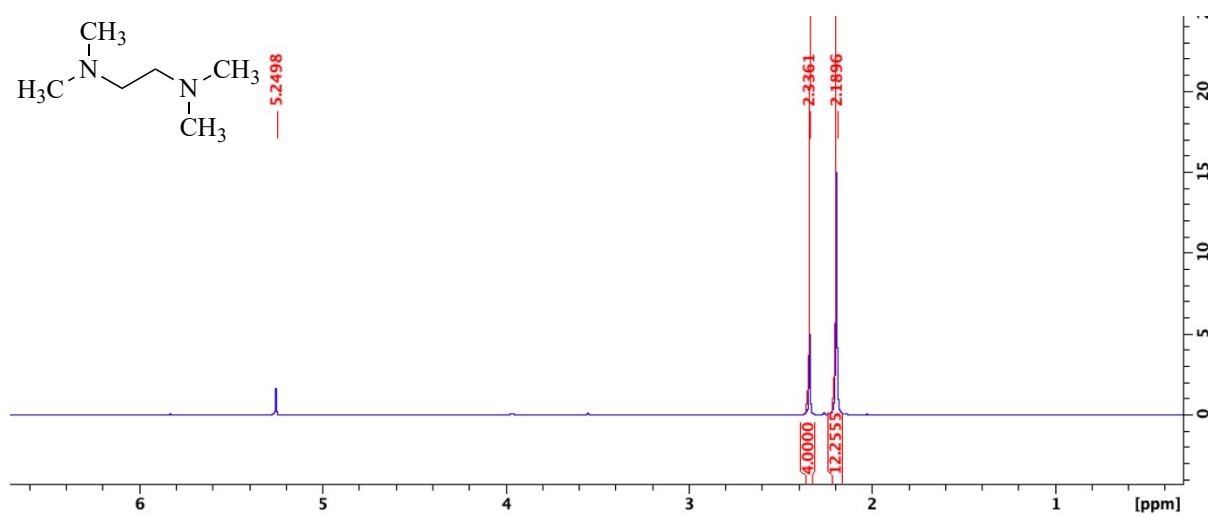

**Fig. S5.** <sup>1</sup>H 400 MHz NMR spectrum of TMEDA after 72h incubation in freshwater media

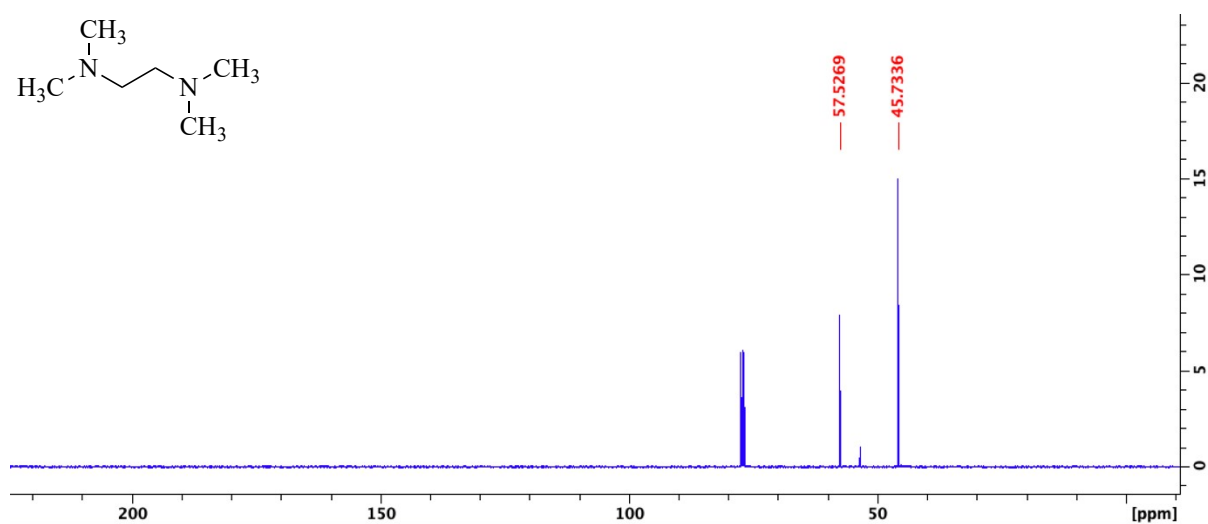

**Fig. S6.** <sup>13</sup>C 400 MHz NMR spectrum of TMEDA after 72h incubation in freshwater media

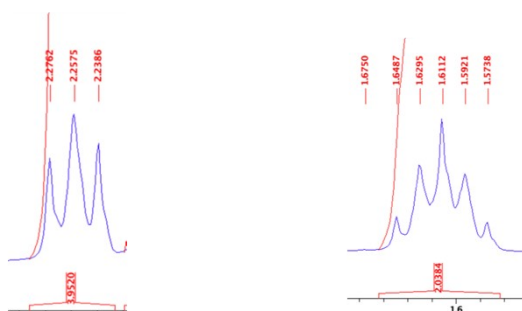

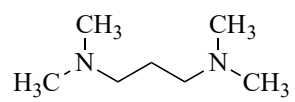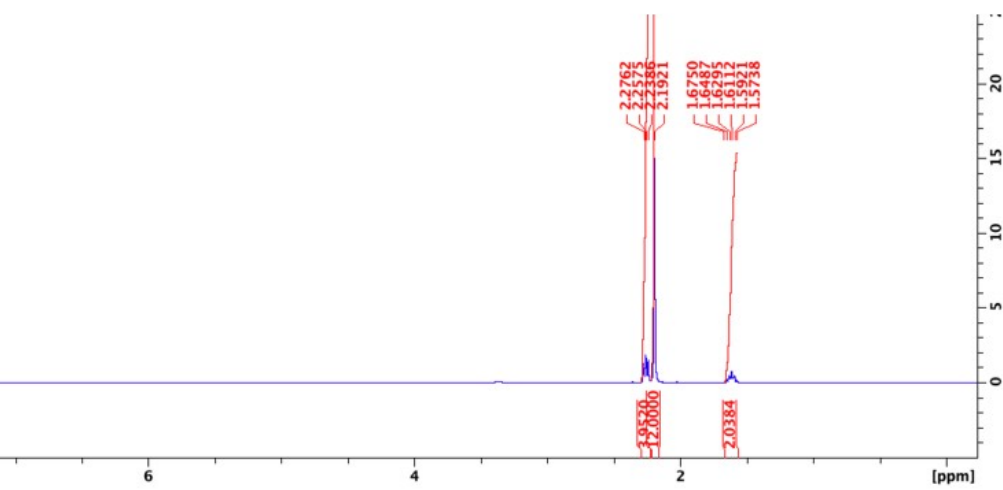

Fig. S7.  $^1\text{H}$  400 MHz NMR spectrum of TMPDA without incubation

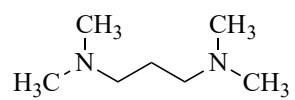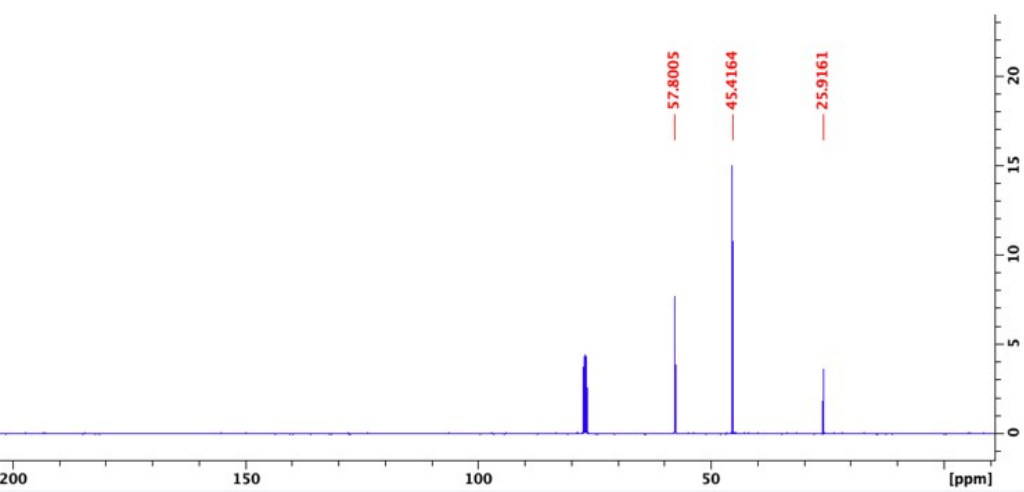

**Fig. S8.**  $^{13}\text{C}$  400 MHz NMR spectrum of TMPDA without incubation

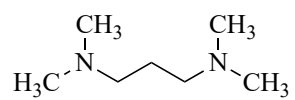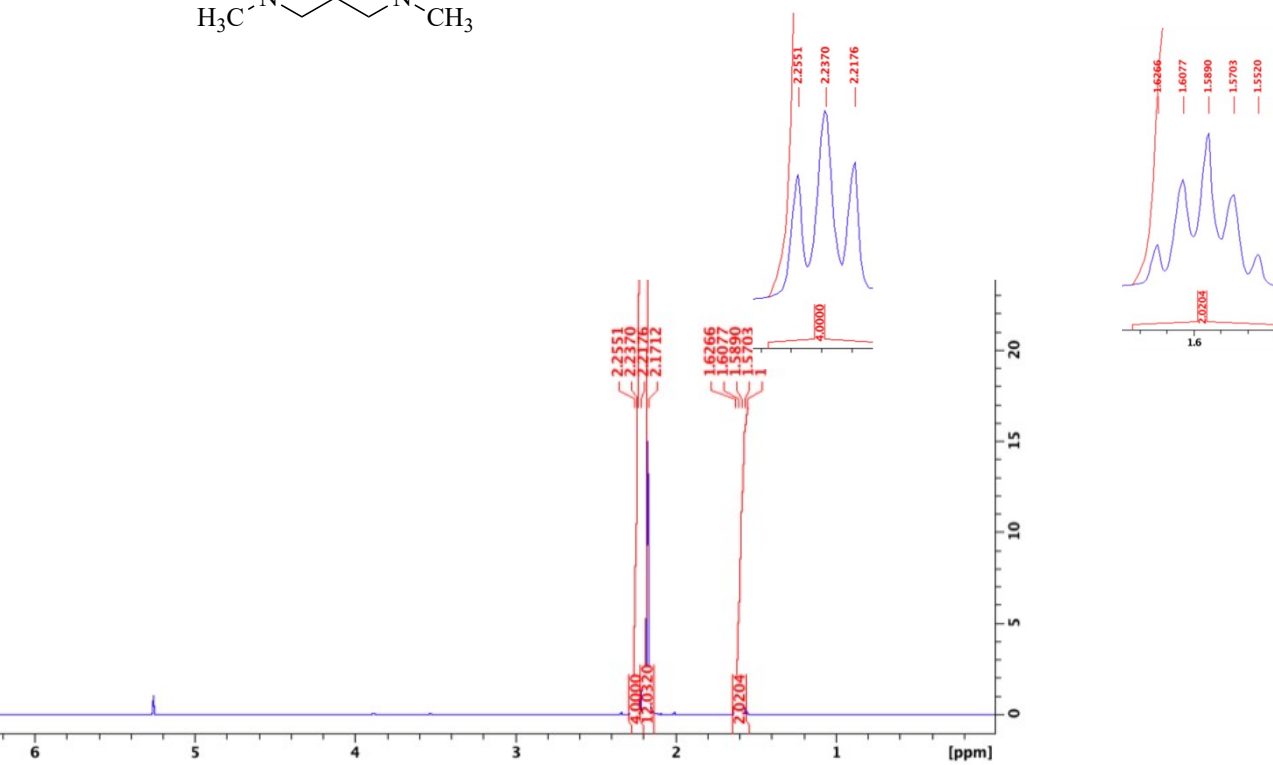

Fig. S9. <sup>1</sup>H 400 MHz NMR spectrum of TMPDA after 15-minute incubation in NaCl



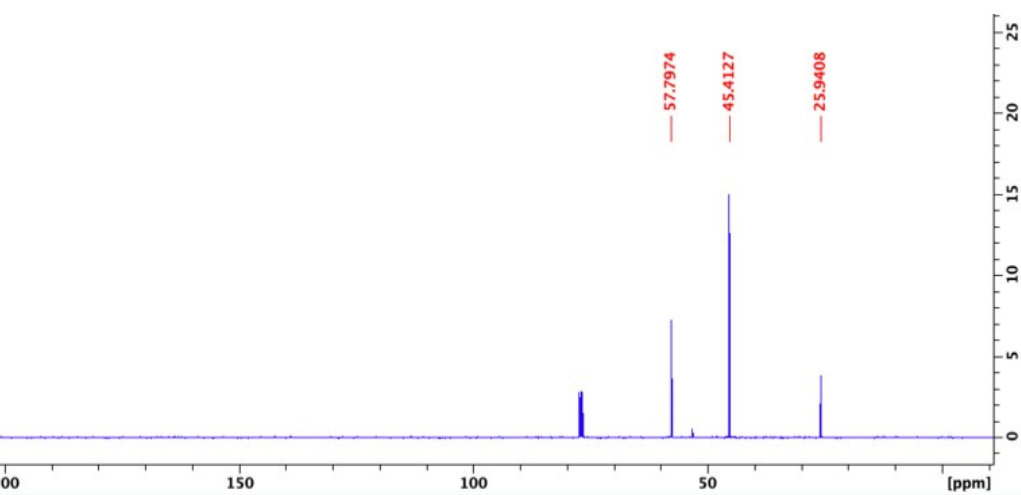

**Fig. S10.**  $^{13}\text{C}$  400 MHz NMR spectrum of TMPDA after 15-minute incubation in NaCl

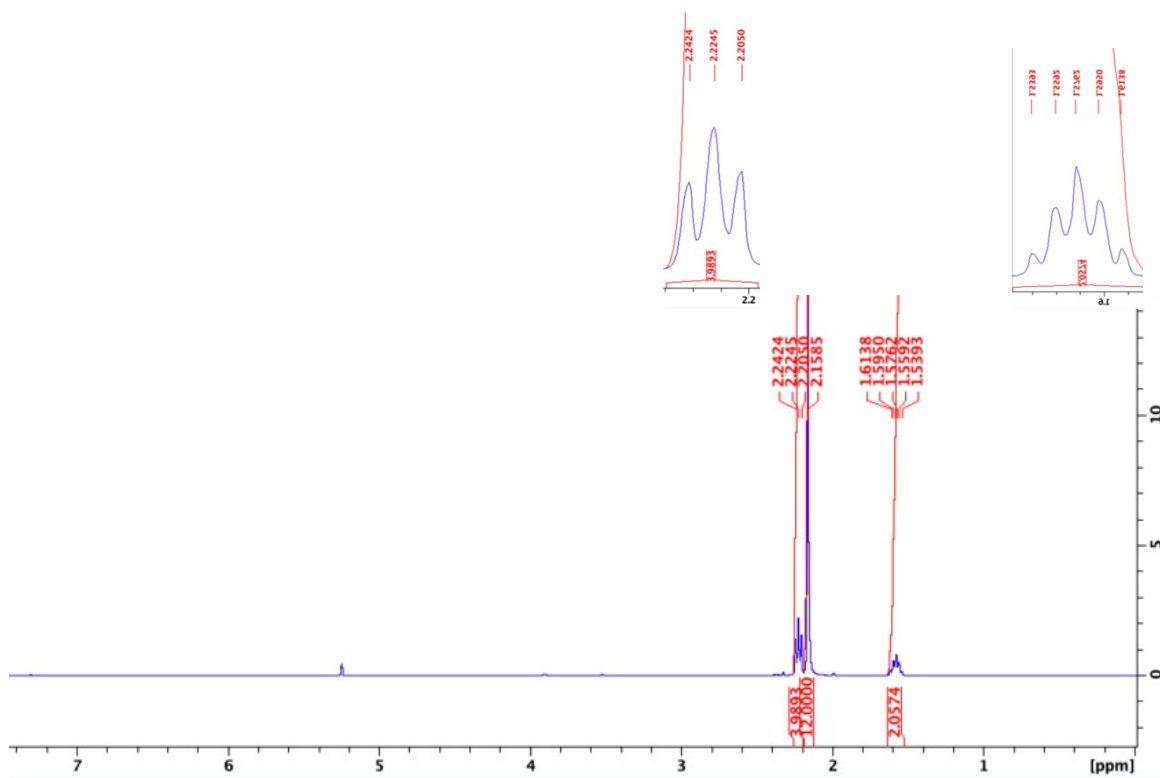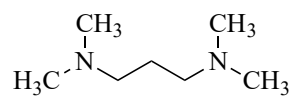

**Fig. S11.** <sup>1</sup>H 400 MHz NMR spectrum of TMPDA after 72h incubation in freshwater media

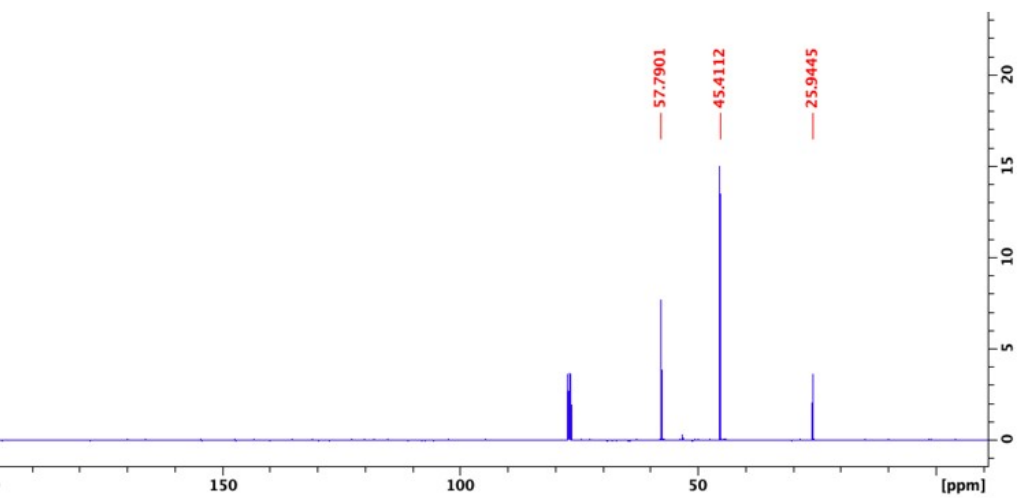

**Fig. S12.**  $^{13}\text{C}$  400 MHz NMR spectrum of TMPDA after 72h incubation in freshwater media

## Linear trends for $\log(1/EC_{50})$ versus $\log K_{ow}$ according to test organisms

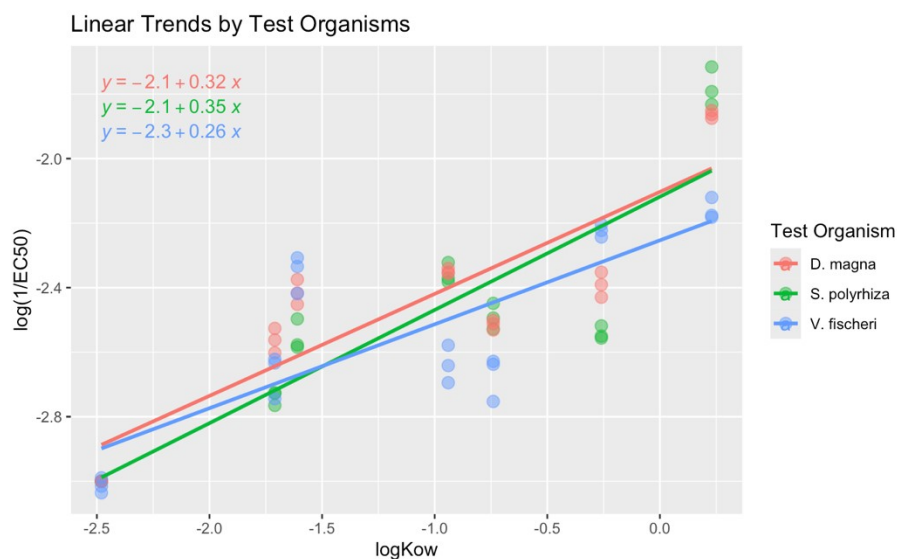

**Fig. 13.** Plot of  $\log(1/EC_{50})$  against  $\log K_{ow}$  for tested compounds

```
Call:
lm(formula = log ~ logKow * test, data = amine_stat)

Residuals:
    Min       1Q   Median       3Q      Max
-0.34672 -0.12701  0.01172  0.11129  0.36475

Coefficients:
              Estimate Std. Error t value Pr(>|t|)
(Intercept)  -2.10323    0.06189  -33.983 < 2e-16 ***
logKow         0.31610    0.04504   7.018 2.97e-09 ***
testS_pol     -0.01514    0.08753  -0.173  0.8632
testV_fish    -0.15017    0.08753  -1.716  0.0916 .
logKow:testS_pol  0.03470    0.06369   0.545  0.5880
logKow:testV_fish -0.05594    0.06369  -0.878  0.3835
---
Signif. codes:  0 '***' 0.001 '**' 0.01 '*' 0.05 '.' 0.1 ' ' 1

Residual standard error: 0.1772 on 57 degrees of freedom
Multiple R-squared:  0.7193,    Adjusted R-squared:  0.6946
F-statistic: 29.21 on 5 and 57 DF,  p-value: 1.436e-14
```

**Fig. 14.** Summary output of a linear regression model

Eq1 and eq2 were taken from the literature.<sup>1</sup>

$$\text{eq1 (inert compounds): } \log(1/EC_{50}) = 0.824 * \log K_{ow} + 1.58$$

$$\text{eq2 (less inert compounds): } \log(1/EC_{50}) = 0.571 * \log K_{ow} + 2.78$$

$$\text{eq3 (tested amines): } \log(1/EC_{50}) = 0.32 * \log K_{ow} - 2.$$

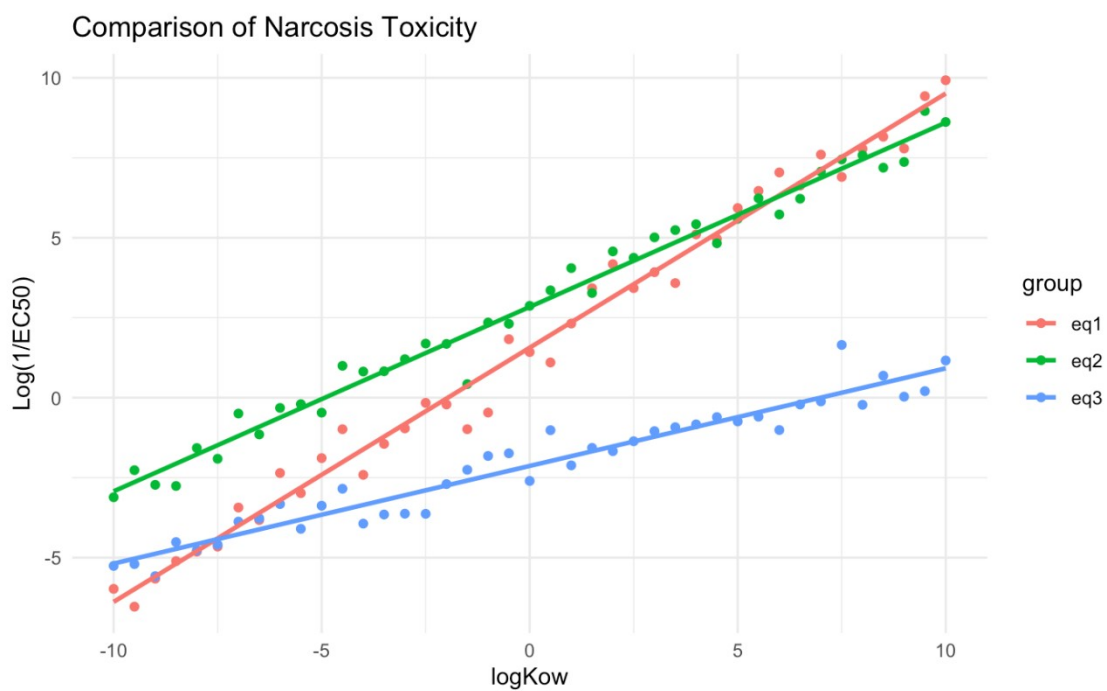

**Fig 15.** Comparison of narcosis toxicity to *D. magna*

**References:**

- 1 X. Zhang, W. Qin, J. He, Y. Wen, L. Su, L. Sheng and Y. Zhao, Discrimination of excess toxicity from narcotic effect: Comparison of toxicity of class-based organic chemicals to daphnia magna and tetrahymena pyriformis, *Chemosphere*, 2013, **93**, 397–407.
